# Supplementary material
Source: PubMed Central journal article supplement (PMC5943707)
Supplement: NIHMS963199-supplement-Supplemental.pdf [file NIHMS963199-supplement-Supplemental.pdf]

SDC 1: Schematic of design for isolated rat lung studies.

1A: Prevention Arm

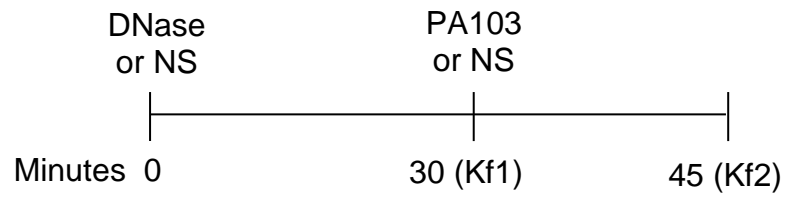

1B: Reversal Arm

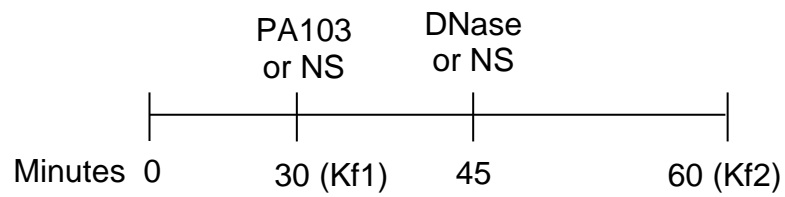

SDC 2: DNA Primers for qPCR

|      | Forward               | Reverse               |
|------|-----------------------|-----------------------|
| COX2 | GCTGTCATTCTTATTCTAA   | GGATTATGTAGGAGTCAA    |
| ND6  | CCATCGCTGTAGTATATCCAA | TCGGGTGTGTTATTATTCTGA |
| 16S  | TTCGGACCTCACGCTATCAG  | ATCATCCTCTCAGACCAGTT  |
| hB2M | TATCCAACATCAACATCT    | AAGCAGAGTATGTAAATTG   |

SDC 3: Bacterial species identified in patients with VAP

| Bacterial Species*            | n |
|-------------------------------|---|
| <i>Staph aureus</i>           | 8 |
| <i>Pseudomonas aeruginosa</i> | 3 |
| <i>Burkholderia cepacia</i>   | 1 |
| <i>Enterobacter species</i>   | 2 |
| <i>Group C streptococcus</i>  | 1 |
| <i>Haemophilus influenzae</i> | 2 |
